# Supplementary material
Source: publisher site journal article supplement (https://www.dovepress.com/article/supplementary_file/617895/617895%20Supplementary%20Material_1.docx)
Supplement: Supplementary file 1 [file 617895%20Supplementary%20Material_1.docx]

Table S1. Summary of the model structure and parameter estimation for external validation.

| **Model** | **Author and year** | **Compartments** | **Population Typical Value** | **Inter-individual variability (IIV)** | **Residual variability (RV)** | **Model evaluation method** | **Covariates incorporated** | **Formulation** |
| --- | --- | --- | --- | --- | --- | --- | --- | --- |
| 1 | Couffignal et al. (2014) [17] | 2-CMT | CL: 13.2 L/h  V1: 20.4 L  V2: 9.8 L  Q: 12.2 L/h | CL: 38%  V1: 31% | Proportional:  33% | GOF  VPC  NPDE  Bootstrap | CLcr4h on CL,  TBW and ALB on V1 | CL=13.2×(CLcr/86.4)^0.2 V1=20.4×(BW/77)^1.3×(ALB/18)^(-1.1) |
| 2 | Chen et al. (2020) [18] | 2-CMT | CL: 8.88 L/h  Q: 1.74 L/h  V1: 20.5 L  V2: 8.86 L | CL: 17.7%  V1: 14.8% | Proportional:  6.2%  Additive:  0.003 mg/L | Bootstrap  VPC  GOF | CLcrCG, BW, and ECMO on CL | With ECMO:  CL=8.88×(CLcrCG/59.1)^0.295×(BW/65.0)^0.306×e^1.16×e^ηCL  Without ECMO:  CL=8.88×(CLcrCG/59.1)^0.295×(BW/65.0)^0.306×e^ηCL |
| 3 | Nguyen et al. (2021) [19] | 1-CMT | CL: 7.88 L/h  V: 15.1 L | CL: 29.4%  V: 10.7% | Proportional:  23.3% | Bootstrap  VPC  GOF  NPDE | CLcrCG on CL | CL=7.88×(CLcrCG/75.54)^0.532×e^ηCL |
| 4 | Jaruratanasirikul et al. (2021) [20] | 2-CMT | CL: 13.3 L/h  V1: 13.6 L  V2: 16.9 L  Q: 24.3 L/h | CL: 51%  V1: 66.9%  V2: 56% | Proportional:  18.3%  Additive:  0.216 mg/L | pcVPC  NPDE  Bootstrap | eGFRCKD-EPI on CL  ABW on V1 | CL=13.3+0.112×(eGFRCKD-EPI -89)  V1=13.8-0.348×(ABW-60) |
| 5 | Por et al. (2021) [13] | 2-CMT | CL: 15.31 L/h  V1: 32.67 L  V2: 41.23 L  Q: 11 L/h | CL: 30.5%  V1: 36.1% | Proportional:  30% | NPDE  Bootstrap  VPC  External validation | BW and ALB on Vc,  ALB on Vp,  With CVVH:  CLcrCG, WT on CL;  Without CVVH:  BW on CL | Vc=32.67×(BW/99.5)^0.74×(ALB/2.7)^(-1.17)×e^ηVc  Vp=41.23×(ALB/2.7)^(-3.68)  Without CVVH: CL=15.31×(CLcrCG/145.83)^0.46×(BW/99.5)^0.33×e^ηCL  With CVVH:  CL=13.78×(BW/99.5)^0.75×e^ηCL+1.56 |
| 6 | Dinh et al. (2022) [21] | 2-CMT | CL: 4.79 L/h  V1: 11.1 h  V2: 8.82 L  Q: 11.1 L/h | CL: 38.7%  V1: 56.3%  V2: 69.4%  Q: 110% | Proportional:  22.1%  Additive:  0.445 mg/L | GOF  NPDE  VPC  Bootstrap | CLcrCG on CL | CL=4.79×e^(0.00642×CLcrCG) |
| 7 | Bai et al. (2024) [22] | 2-CMT | CL: 11.357 L/h  Q: 7.645 L/h  V1: 16.378 L  V2: 10.904 L | CL: 35.75%  V1: 89.85%  V2: 8.32% | Proportional:  30.37% | Bootstrap  VPC  GOF | CLcrCG on CL | CL=11.357×(CLcrCG/99.896)^0.473×e^η |
| 8 | Wang et al. (2024) [23] | 2-CMT | CL: 13.1 L/h  V1: 11.7 L  V2: 29.3 L  Q: 11.9 L/h | CL: 8.32% | Additive:  0.575 mg/L | GOF  pcVPC  Bootstrap  External validation | CLcrCG on CL | CL=13.1×(CLcrCG/71)^(0.263)×e^ηCL |
| 9 | Truong et al. (2025) [24] | 2-CMT | CL: 14.6 L/h  V1: 28.7 L  V2: 21.4 L  Q : 2.9 L/h | CL: 35.9 % | Proportional:  38.30% | Bootstrap  VPC  GOF  External validation | CLcrCG on CL | CL=14.6×(CLcrCG/87.6)^0.462 |

CL, Clearance; V1, Volume of Central Compartment; Q, Intercompartmental Clearance; V2, Volume of Peripheral Compartment/Peripheral Compartment 1; CLcr, clearance creatinine; BW, body weight; ALB, albumin; ECMO, extracorporeal membrane oxygenation; CLcrCG, clearance creatinine estimated by Cockcroft and Gault equation; TBW, total body weight; eGFRCKD-EPI, estimated glomerular filtration rate measured by the Chronic Kidney Disease Epidemiology Collaboration equation; ABW, adjusted body weight; CLcr4h, 4h creatinine clearance.

Table S2. Demographics of patients for popPK model validated in this study.

| **Model** | **Author and year** | **Country** | **Study Type** | **Patient Group** | **Number of Patients** | **Sample**  **Size** | **Gender**  **(M/F)** | **Age (year)** | **Weight (kg)** |
| --- | --- | --- | --- | --- | --- | --- | --- | --- | --- |
| 1 | Couffignal et al. (2014) [17] | France | Prospective | Critically ill patients with suspected ventilator-associated pneumonia | 51 | 297 | 41/10 | 60 (28-84) | 77 (45-126) |
| 2 | Chen et al. (2020) [18] | China | Retrospective | Critically Ill patients with/without ECMO | 247 | 580 | 167/80 | 67 (20-97) | 65 (37.5-110.0) |
| 3 | Nguyen et al. (2021) [19] | Vietnam | Prospective | AECOPD | 44 | 84 | 41/3 | 65 (60-72) | 50 (47-55) |
| 4 | Jaruratanasirikul et al. (2021) [20] | Thailand | Prospective | Critically ill patients with/without ECMO | 50 | 534 | 35/15 | 56.2 (40.95-66.6) | 62.9 (52.8-70.0) |
| 5 | Por et al. (2021) [13] | USA | Prospective | Burn patients with/without CVVH | 23 | 81 | 6/17 | With CVVH:  55 ± 19.99  Without CVVH:  51.09 ± 19.03 | With CVVH:  89.6 ± 22.38  Without CVVH:  105.06 ± 28.66 |
| 6 | Dinh et al. (2022) [21] | Vietnam | Prospective | Critically-Ill patients | 24 | 139 | 18/6 | 57.5 ± 19.9 | 51.3 ± 8.6 |
| 7 | Bai et al. (2024) [22] | China | Prospective | Critically Ill sepsis | 51 | 196 | 33/18 | 56.45 ± 18.76 | 70.21 ± 72.01 |
| 8 | Wang et al. (2024) [23] | China | Retrospective | Elderly patients | 120 | 370 | 78/42 | 72 (68, 81) | 65 (59, 65.33) |
| 9 | Truong et al. (2025) [24] | Netherlands | Retrospective | Critically ill and non-critically ill patients | 151 | 322 | 151/0 | 63 (51-72) | 70 (61.2-82) |

The age and weight values are presented as the means ± SDs or medians (ranges). USA, United States of America; M/F, Male/Female; AECOPD, Acute Exacerbations of Chronic Obstructive Pulmonary Disease; CVVH, continuous venous hemofiltration; ECMO, extracorporeal membrane oxygenation.

Table S3. Prediction performance of published popPK models for patients with CLcr between 30 and 50 mL/min.

| **Model** | **Author and year** | **Priori** |  |  |  | **Bayesian** |  |  |  |
| --- | --- | --- | --- | --- | --- | --- | --- | --- | --- |
| **rPEmedian (%)** | **rAPEmedian (%)** | **F20 (%)** | **F50 (%)** | **rPEmedian (%)** | **rAPEmedian (%)** | **F20 (%)** | **F50 (%)** |
| 1 | Couffignal et al. (2014) [17] | -109.6 | 122.22 | 11.54 | 23.08 | -72.54 | 96.17 | 0 | 16.67 |
| 2 | Chen et al. (2020) [18] | -163.25 | 169.53 | 3.85 | 3.85 | -70.56 | 95.26 | 0 | 16.67 |
| 3 | Nguyen et al. (2021) [19] | 7.52 | 77.07 | 23.08 | 34.62 | -68.17 | 105.57 | 0 | 0 |
| 4 | Jaruratanasirikul et al. (2021) [20] | -17.85 | 69.95 | 15.38 | 26.92 | -36.34 | 90.89 | 33.33 | 33.33 |
| 5 | Por et al. (2021) [13] | 41.44 | 84.46 | 7.69 | 26.92 | 27.02 | 93.41 | 16.67 | 33.33 |
| 6 | Dinh et al. (2022) [21] | 30.71 | 61.48 | 11.54 | 42.31 | -49.14 | 112.87 | 0 | 16.67 |
| 7 | Bai et al. (2024) [22] | 16 | 72.26 | 23.08 | 30.77 | -49.52 | 113.35 | 0 | 16.67 |
| 8 | Wang et al. (2024) [23] | -22.82 | 64.54 | 11.54 | 46.15 | -60.39 | 102.01 | 0 | 16.67 |
| 9 | Truong et al. (2025) [24] | -2.87 | 73.98 | 3.85 | 38.46 | -63.58 | 105.36 | 0 | 0 |

Npriori_plasma_sample = 26, Nbayesian_plasma_sample = 6; MPE, median prediction error; MAPE, median absolute prediction error; F20, F50, the percentage of PE% within 20% and 50%.

Table S4. Prediction performance of published popPK models for patients with CLcr < 30 mL/min.

| **Model** | **Author and year** | **Priori** |  |  |  | **Bayesian** |  |  |  |
| --- | --- | --- | --- | --- | --- | --- | --- | --- | --- |
| **rPEmedian (%)** | **rAPEmedian (%)** | **F20 (%)** | **F50 (%)** | **rPEmedian (%)** | **rAPEmedian (%)** | **F20 (%)** | **F50 (%)** |
| 1 | Couffignal et al. (2014) [17] | -168.07 | 168.07 | 0 | 7.14 | -17.95 | 24.17 | 50 | 100 |
| 2 | Chen et al. (2020) [18] | -178.97 | 178.97 | 0 | 0 | 8.46 | 8.46 | 100 | 100 |
| 3 | Nguyen et al. (2021) [19] | -9.47 | 44.88 | 28.57 | 57.14 | 5.68 | 24.21 | 50 | 100 |
| 4 | Jaruratanasirikul et al. (2021) [20] | -38.88 | 45.30 | 14.29 | 57.14 | 13.62 | 13.62 | 100 | 100 |
| 5 | Por et al. (2021) [13] | -9.88 | 45.24 | 21.43 | 57.14 | 7.96 | 15.05 | 50 | 100 |
| 6 | Dinh et al. (2022) [21] | -44.4 | 58.67 | 28.57 | 42.86 | 3.11 | 14.07 | 100 | 100 |
| 7 | Bai et al. (2024) [22] | -15.55 | 44.75 | 21.43 | 57.14 | 6.92 | 6.92 | 100 | 100 |
| 8 | Wang et al. (2024) [23] | -92.77 | 101.36 | 14.29 | 21.43 | 12.7 | 18.96 | 50 | 100 |
| 9 | Truong et al. (2025) [24] | -44.96 | 59.50 | 7.14 | 35.71 | -10.08 | 10.08 | 100 | 100 |

Npriori_plasma_sample = 14, Nbayesian_plasma_sample = 2; MPE, median prediction error; MAPE, median absolute prediction error; F20, F50, the percentage of PE% within 20% and 50%.

Table S5. Summary of NPDE statistics.

| **Model** | **Couffignal et al. (2014)** [17] | **Chen et al. (2020)** [18] | **Nguyen et al. (2021)** [19] | **Jaruratanasirikul et al. (2021)** [20] | **Por et al. (2021)** [13] | **Dinh et al. (2022)** [21] | **Bai et al. (2024)** [22] | **Wang et al. (2024)** [23] | **Truong et al. (2025)** [24] |
| --- | --- | --- | --- | --- | --- | --- | --- | --- | --- |
| Mean | 0.69 | 1.49 | 0.05 | 0.01 | -0.54 | -0.24 | -0.25 | 0.14 | 0.13 |
| P value | P<0.01 | P<0.01 | 1 | 1 | P<0.01 | P<0.05 | P<0.05 | 0.78 | 0.52 |
| Variance | 2.19 | 3.00 | 2.50 | 1.36 | 2.49 | 1.47 | 1.77 | 3.22 | 1.83 |
| P value | P<0.01 | P<0.01 | P<0.01 | P<0.01 | P<0.01 | P<0.01 | P<0.01 | P<0.01 | P<0.01 |
| Kurtosis | -0.01 | 1.45 | -0.36 | 1.46 | -0.09 | 0.66 | 0.40 | -0.67 | 0.10 |
| Skewness | -0.39 | -1.35 | -0.13 | -0.14 | 0.52 | 0.27 | 0.20 | 0.16 | 0.15 |
| SW test | 0.01 | P<0.01 | P<0.05 | P<0.01 | P<0.01 | P<0.05 | P<0.05 | P<0.01 | 0.19 |
| Global test | P<0.01 | P<0.01 | P<0.01 | P<0.01 | P<0.01 | P<0.01 | P<0.01 | P<0.01 | P<0.01 |


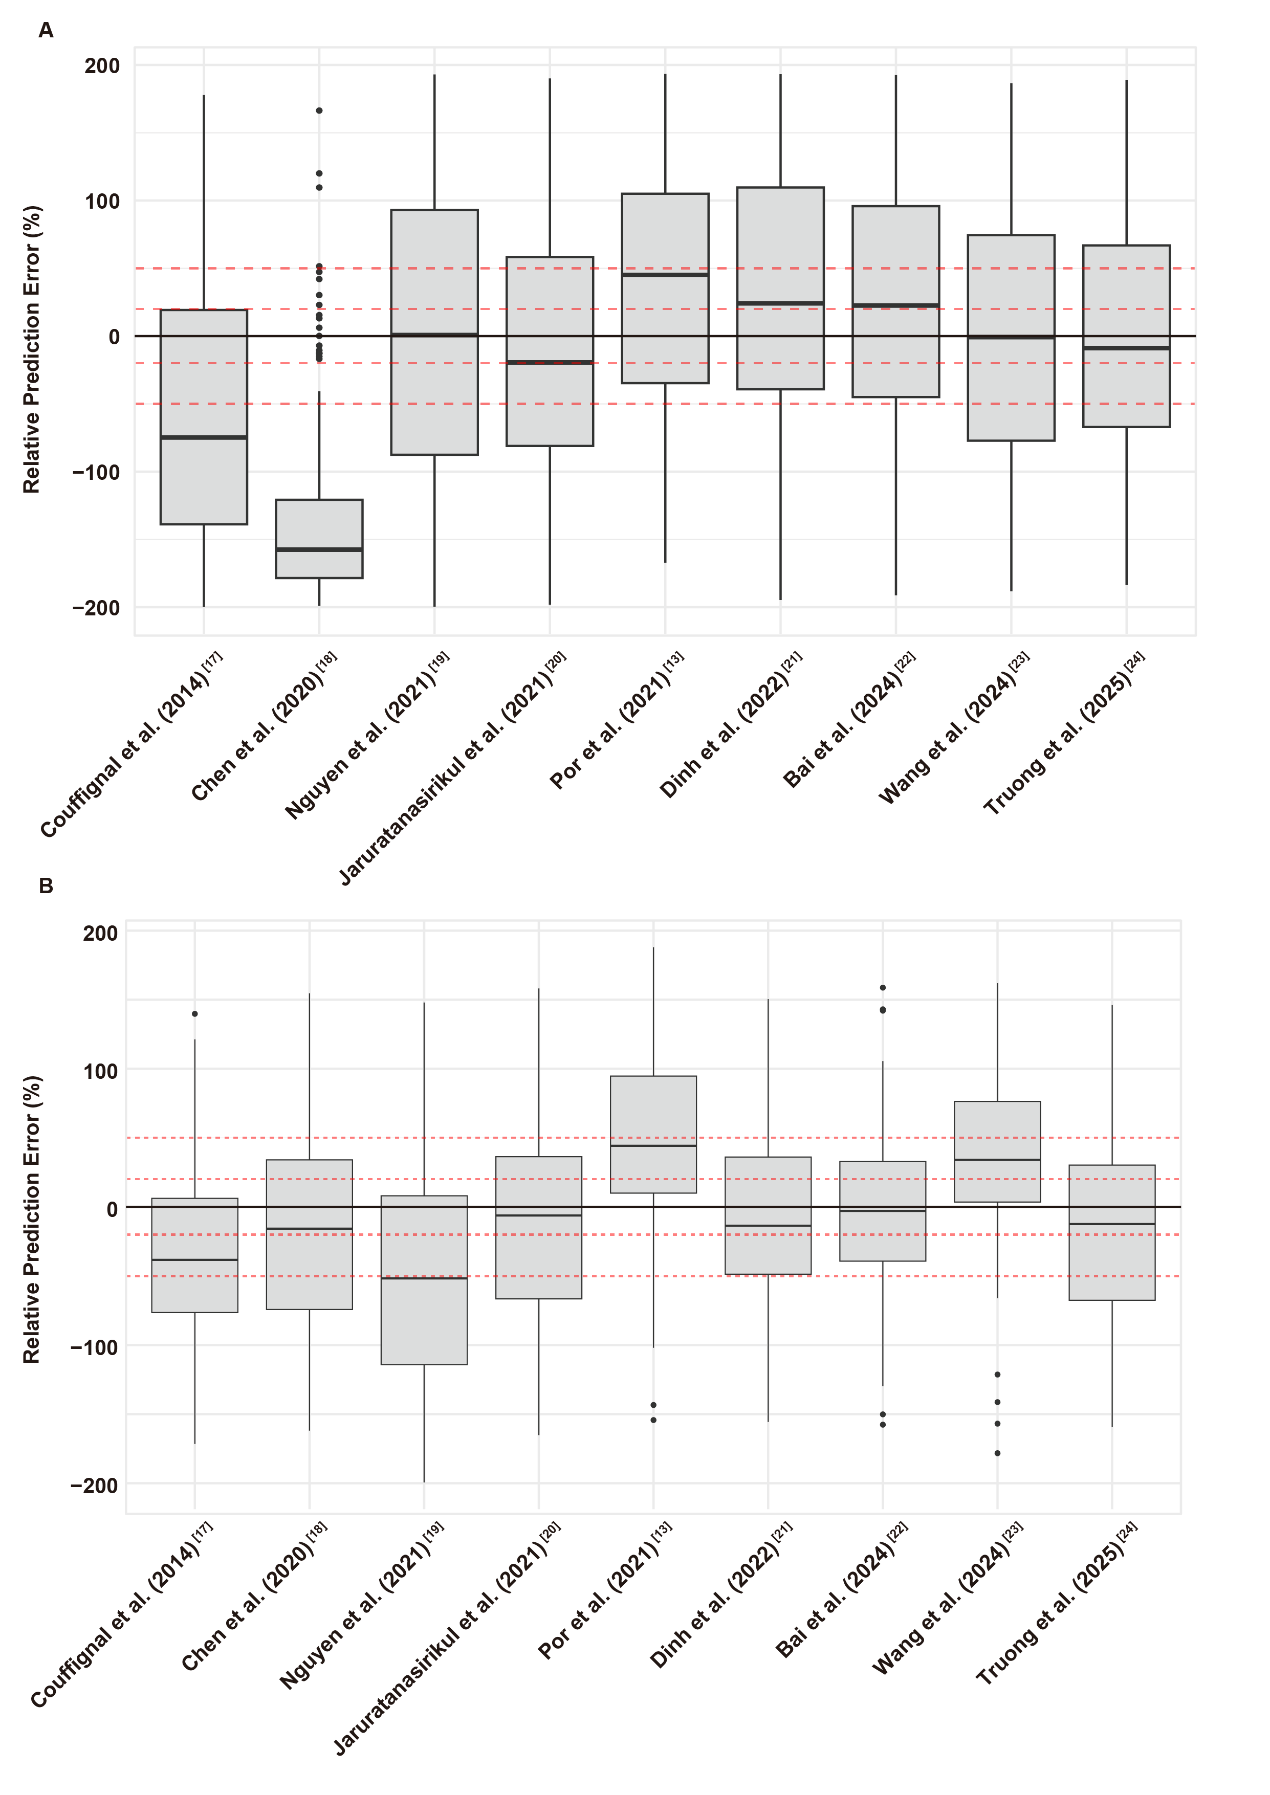


Figure S1. Summary of the prediction performance of published popPK models.

**A** for Priori prediction and **B** for Bayesian forecasting. Red dashed lines are the F20 and F50.


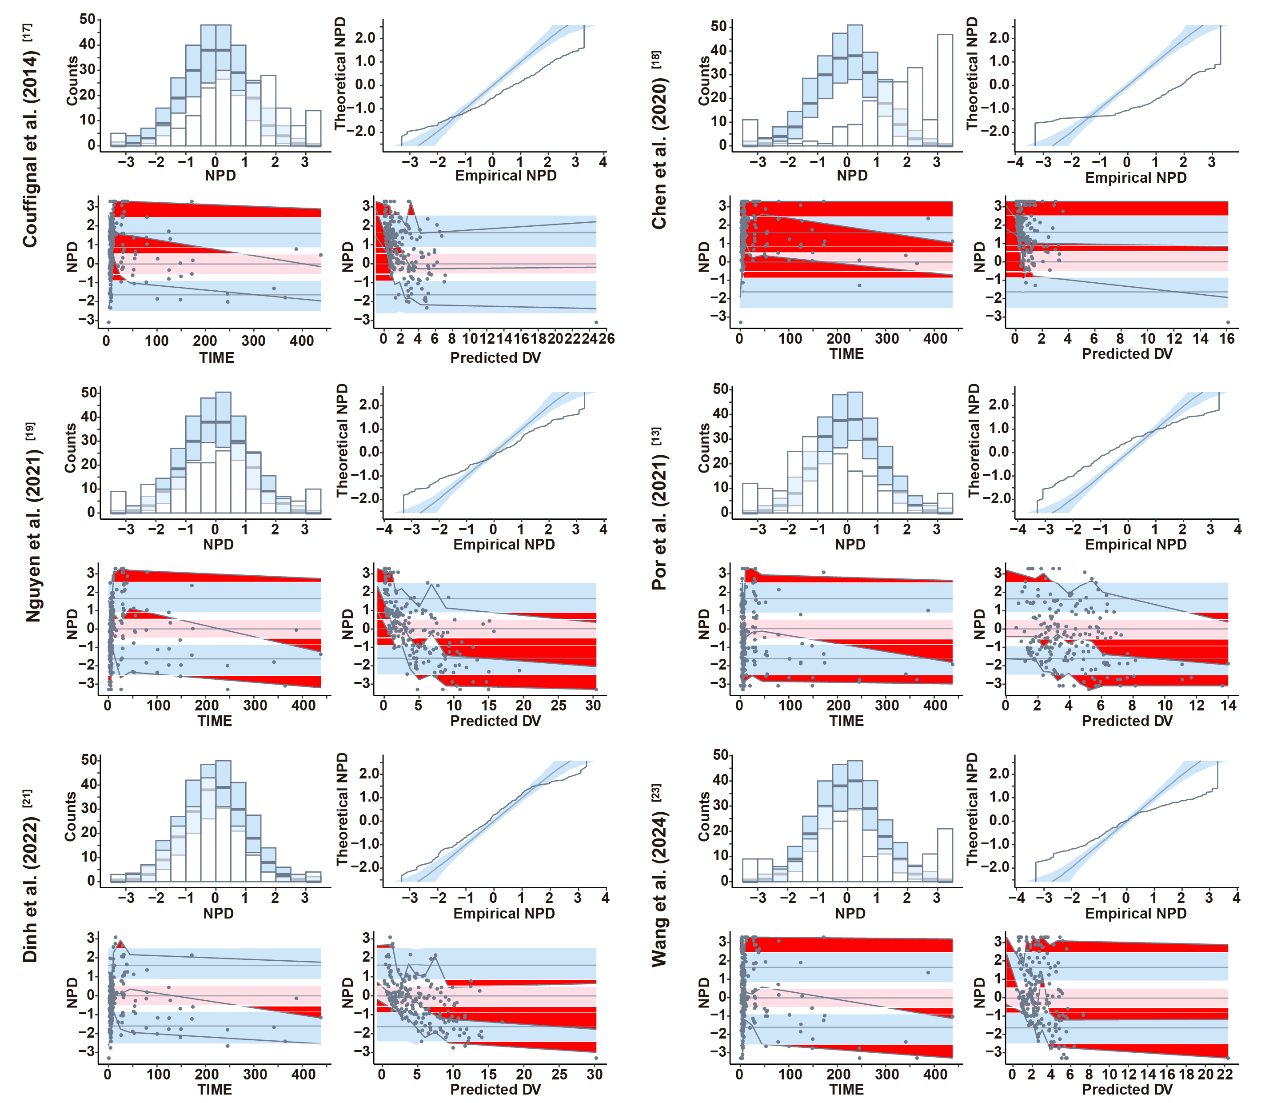


Figure S2. NPDE graphics of the six popPK models. Distribution of NPDE values (histogram and quantile-quantile plot) and model diagnostic scatter plots of NPDE vs. time and NPDE vs. predicted concentration (predicted DV). Prediction intervals are shown as colored areas: blue bands represent the 5th and 95th prediction intervals, and the pink band indicates the median prediction. NPDE, normalized prediction distribution errors.
